# Supplementary material for: Structure, Stability, and Superconductivity of Two-Dimensional Janus NbSH Monolayers: A First-Principle Investigation
Source: MDPI journal article supplement (doi:10.3390/molecules28145522), 2023-07-19

# Supplementary Mastherial for

## Structure, Stability, and Superconductivity of Two-Dimensional

### Janus NbSH Monolayers: A First-Principle Investigation

Yan Li <sup>1</sup>, Chunying Pu<sup>2\*</sup>, and Dawei Zhou<sup>2\*</sup>

<sup>1</sup> Institute for Computational Materials Science, School of Physics and Electronics, International Joint Research Laboratory of New Energy Materials and Devices of Henan Province, Henan University, Kaifeng 475004, China

<sup>2</sup> Henan International Joint Laboratory of MXene Materials Microstructure, College of Physics and Electronic Engineering, Nanyang Normal University, Nanyang 473061, China;

\* Correspondence: puchunying126.com(C.P.); zhoudawei@nynu.edu.cn(D.Z.)

**Figure S1** The phonon dispersion relations (a) 2H-NbSH (b) 1T-NbSH.

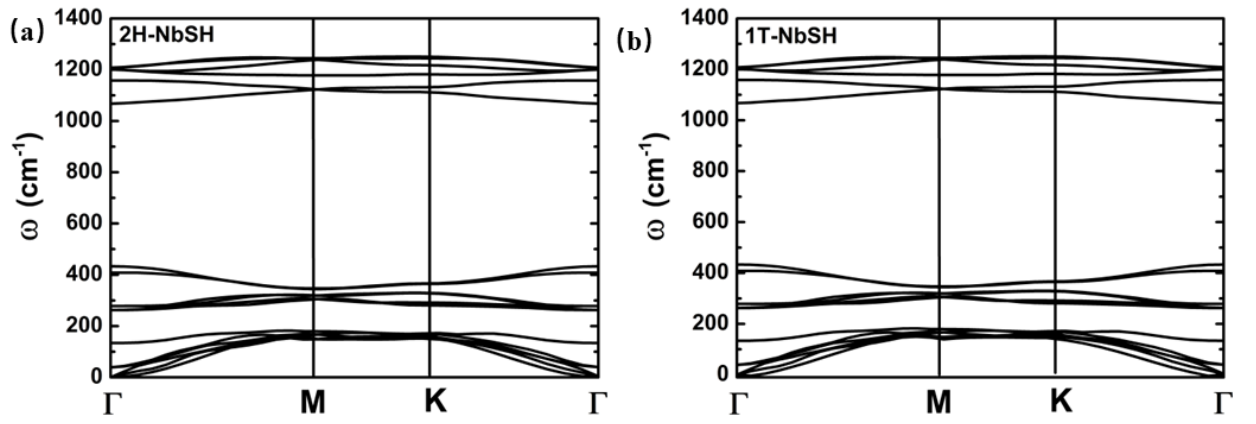

**Figure S2** The calculated total density of states (TDOS) of the three NbSH phases with spin-polarized effect considered (a) 1T-NbSH, (b) 2H-NbSH and (c) Predicted-NbSH

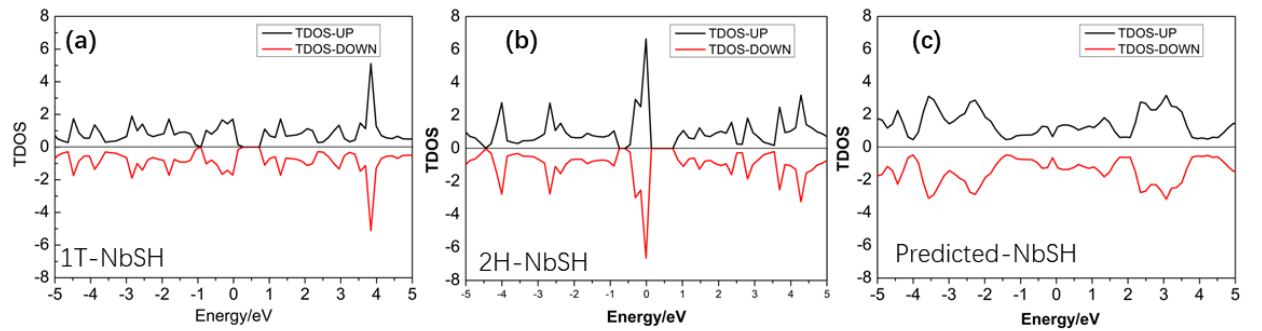

Supplement: s1 [file s1]
